# Supplementary material for: Copy Number Variant in the Region of Adenosine Kinase (ADK) and Its Possible Contribution to Schizophrenia Susceptibility
Source: Oxford University Press journal article supplement (doi:10.1093/ijnp/pyx103), 2017-11-01
Supplement: pyx103_suppl_supplementary_material.docx [file pyx103_suppl_supplementary_material.docx]

Supplementary Information

**Copy number variant in the region of Adenosine kinase and its possible contribution to the Schizophrenia Susceptibility**

Hiroki Kimura1, Itaru Kushima1, 2*, Akira Yohimi1, Branko Aleksic1 and Norio Ozaki1

1 Department of Psychiatry, Nagoya University Graduate School of Medicine, 65 Tsurumai-cho, Showa-ku, Nagoya, Aichi-ken 466-8550, Japan

2 Institute for Advanced Research, Nagoya University, Nagoya, Aichi, Japan

*Corresponding author:

Itaru Kushima, MD, PhD

Department of Psychiatry, Nagoya University Graduate School of Medicine

65 Tsurumai-cho, Showa-ku, Nagoya 466-8550, Japan

***Contents of Supplementary Materials***

**Figure S1**: Details of the break point search

**Figure S2**: the explanation of frame shift due to the deletion of the ADK

**Figure S3**: Trajectories of gene expression in the brain based on Human Brain transcriptome

**Figure S1**: The result of the break point search

**Legend:** A) Break point search by Sanger Sequencing. Position of the breakpoint is marked by red arrowhead. B) Information about genomic coordinates corresponds to Transcript ID ENST00000541550.5; Human genome GRCh38.p7. Blue arrowheads represent the deleted exons of ADK (Chr10: 74292670- chr10: 74623062).

**Figure S2**: The explanation of frame shift due to the deletion of the ADK

**Legend:** A) the sequencing data from Ensemble data (transcript ID: ENST00000541550.5) B) Information about transcript isoform and genomic coordinates corresponds to Transcript ID ENST00000541550.5; Human genome GRCh38.p7. Red arrowheads represent the deleted exons of ADK (Chr10: 74292671- chr10: 74623063). The exonic region of ADK deletion in this study encompasses exons 3–8. C) The Nucleotide Sequencing from the deleted exons. D) Translation from the deleted mRNA. In the deleted amino acid sequencing, there is stop codon at the 32th amino acid.

**Figure S3.** Trajectories of gene expression in the brain based on Human Brain transcriptome.

**Legend:** This figure shows trajectories of exon array-based measurement of gene expression (mRNA level) in the brain by Human Brain Transcriptome. Signal Intensity of ADK is high throughout life.
